# Supplementary material
Source: MDPI journal article supplement (https://www.mdpi.com/2571-8789/7/4/86)
Supplement: s1 [file s1]

Archive with 1 entries (1 files):
- Legends of Supplementary figures.pdf
